# Supplementary material for: Next-century ocean acidification and warming both reduce calcification rate, but only acidification alters skeletal morphology of reef-building coral Siderastrea siderea
Source: PubMed Central journal article supplement (PMC4965865; doi:10.1038/srep29613), 2016-07-29
Supplement: srep29613-s1.pdf [file srep29613-s1.pdf]

*Supplementary Information*

Next-century ocean acidification and warming both reduce calcification rate, but only acidification (not warming) alters skeletal morphology of reef-building coral  
*Siderastrea siderea*

KIMMAREE M. HORVATH, KARL D. CASTILLO, PUALANI ARMSTRONG, ISAAC T. WESTFIELD, TRAVIS COURTNEY, and JUSTIN B. RIES

**Supplementary figures S1 – S6 and tables S1 – S5**

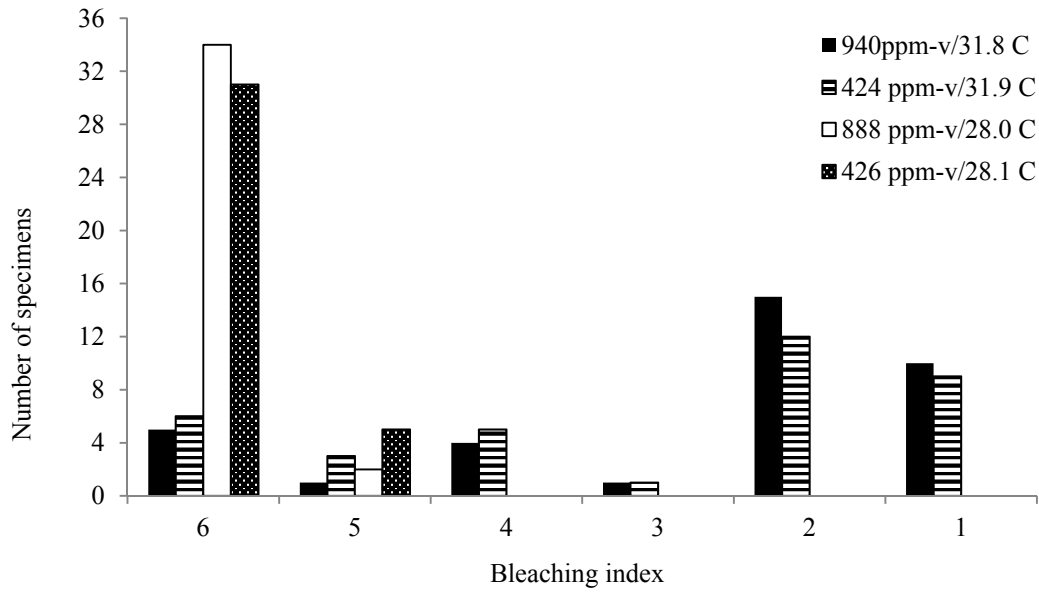

**Figure S1.** Histogram distribution of ‘bleaching index’ (‘1’ = total loss of pigment; ‘6’ = maximum color saturation; *Coral Watch Coral Health Chart*) for *S. siderea* specimens after 60 days of exposure to the four temperature- $p\text{CO}_2$  treatments.

(a)

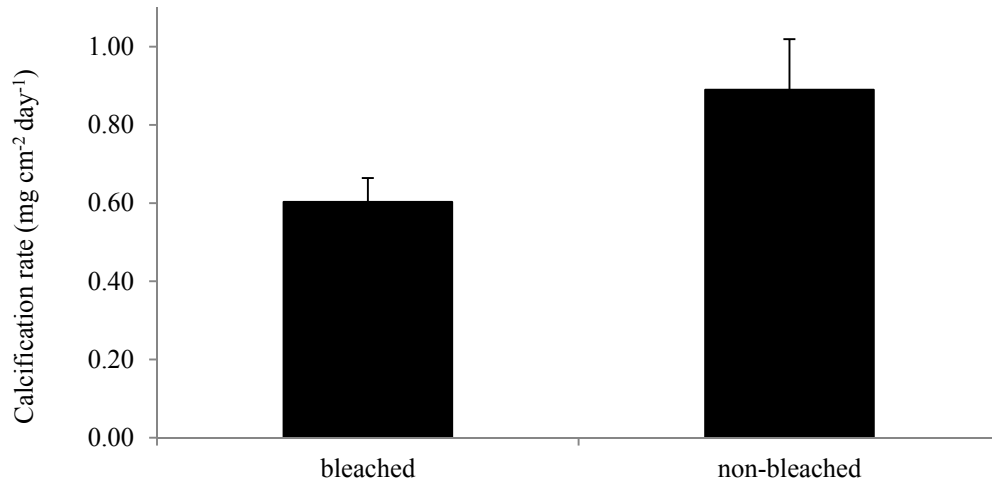

(b)

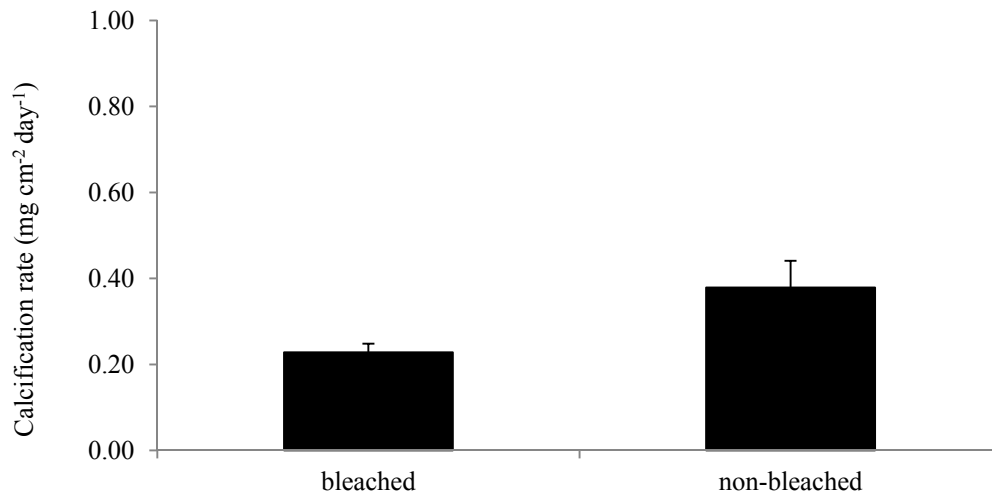

**Figure S2.** Average calcification rate for bleached vs. non-bleached specimens of *S. siderea* in 31.9 °C-424 ppm-v (a) and 31.8 °C-940 ppm-v (b) treatments. ‘Bleaching’ is defined as a two or more unit decrease in bleaching index (1 – 6 scale, *Coral Watch Coral Health Chart*) for a coral specimen between the beginning and end of the experiment. Black vertical bars show standard error.

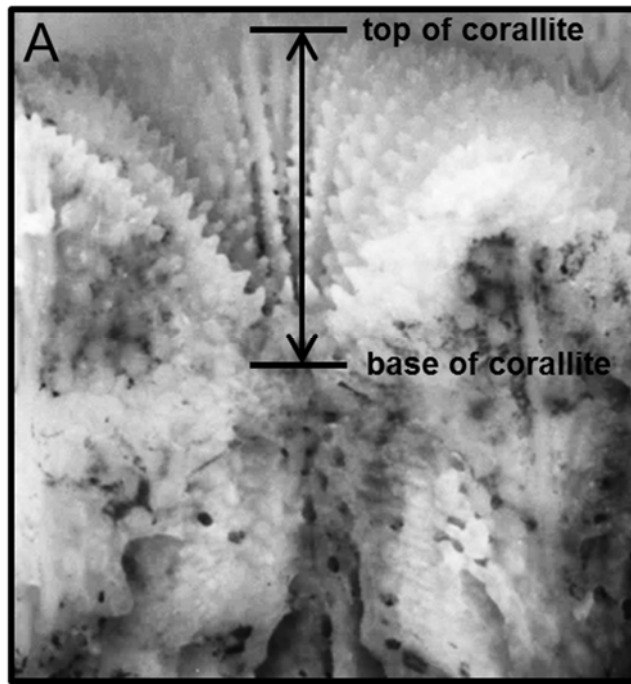

**Figure S3.** Cross-sectional photomicrograph of the corallite structure, showing location of corallite height measurement (arrow) obtained in the present study via stereomicroscopy. Arrow is *ca.* 1200 – 1400  $\mu\text{m}$ .

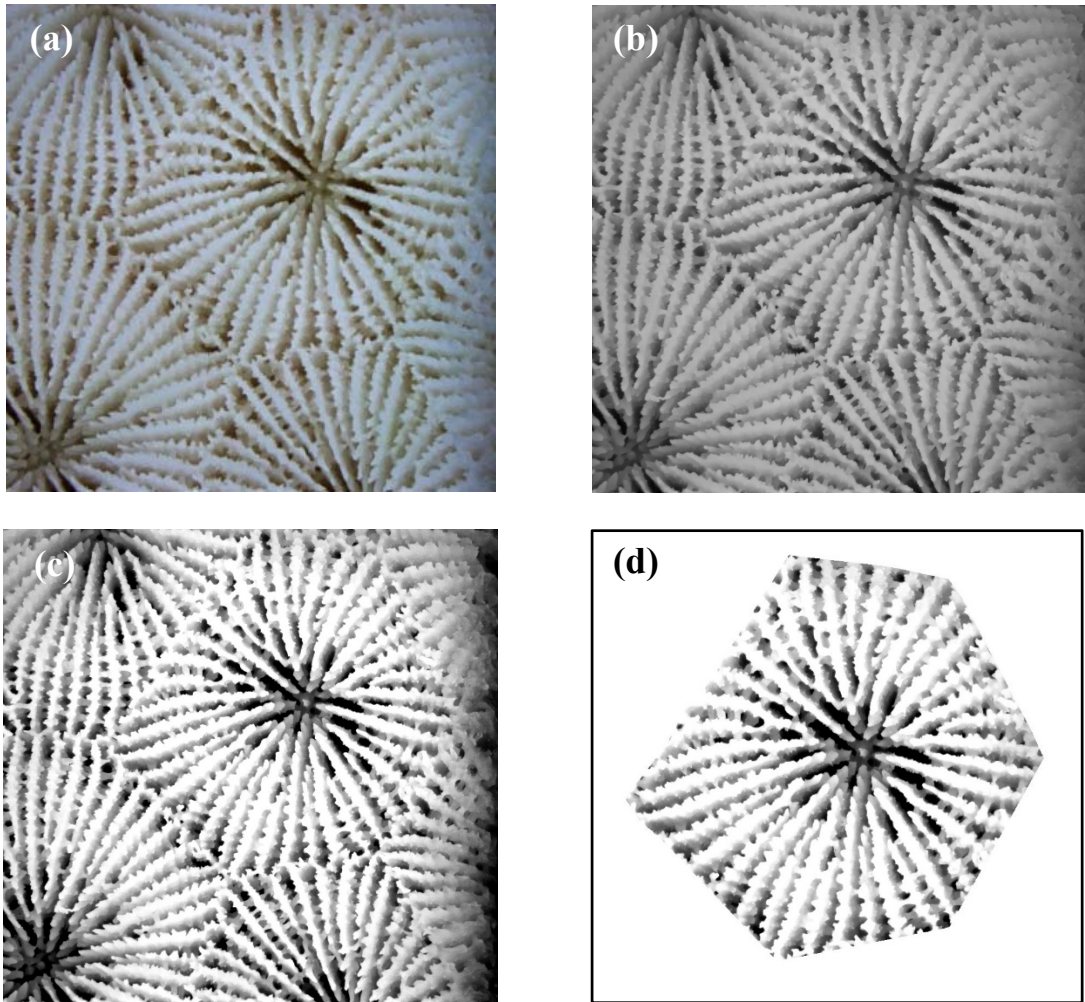

**Figure S4.** Progressive manipulation of photomicrographs of *S. siderea* corallite for quantification of %-infilling: (a) original aligned and fully-focused 32-bit color image; (b) 32-bit color image converted to 8-bit grayscale image; (c) image contrast increased by 30%; and (d) individual corallite cropped for analysis.

**(a)**

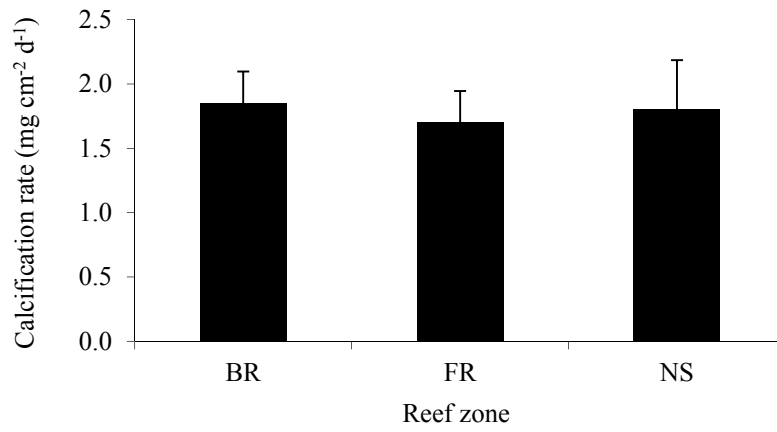

**(b)**

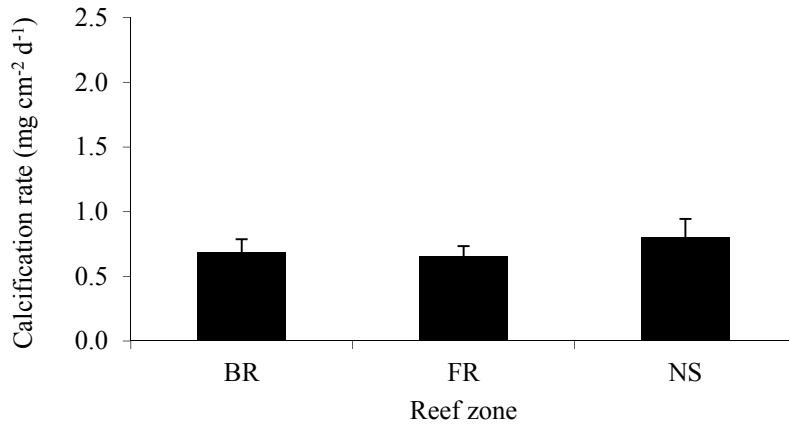

**(c)**

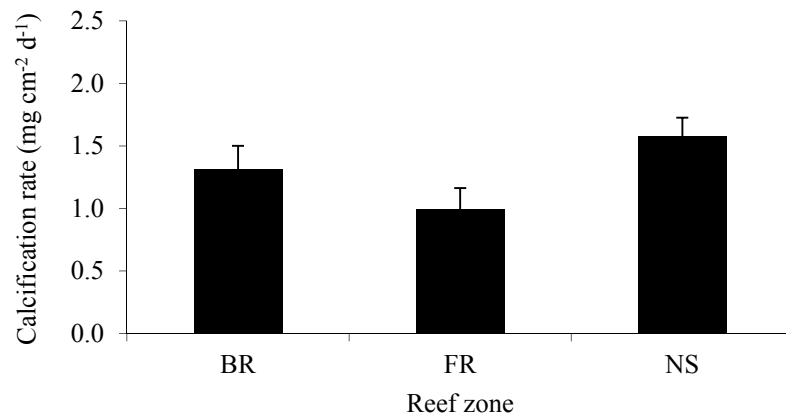

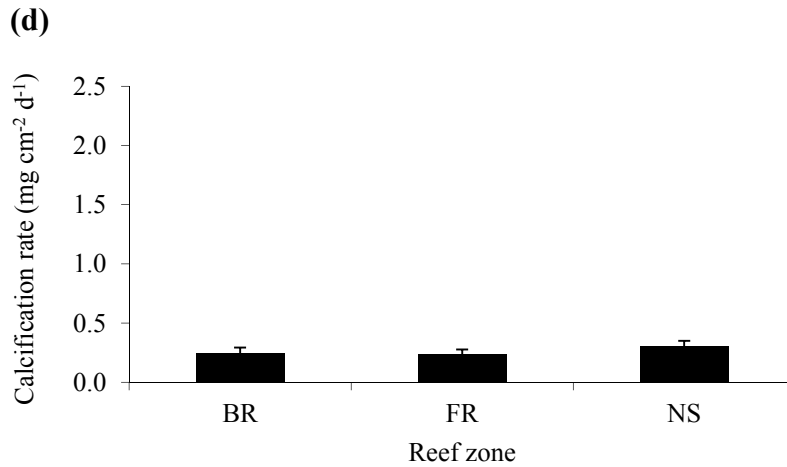

**Figure S5.** Calcification rates of *S. siderea* coral specimens from different reef zones (‘BR’ = backreef; ‘FR’ = forereef; ‘NS’ = nearshore) within the four temperature- $p\text{CO}_2$  treatments: (a) 426 ppmv-28.1 °C; (b) 424 ppmv-31.9 °C; (c) 888 ppmv-28.0 °C; and (d) 940 ppmv-31.8 °C. Linear mixed effects modelling across all treatments (Table S4) revealed that reef zone was not a significant ( $p > 0.05$ ) predictor of calcification rate. However, nearshore corals calcified faster ( $p < 0.008$ ) than forereef corals in the high 888 ppm-v/28 °C treatment (Fig. S6). Black vertical bars show standard error.

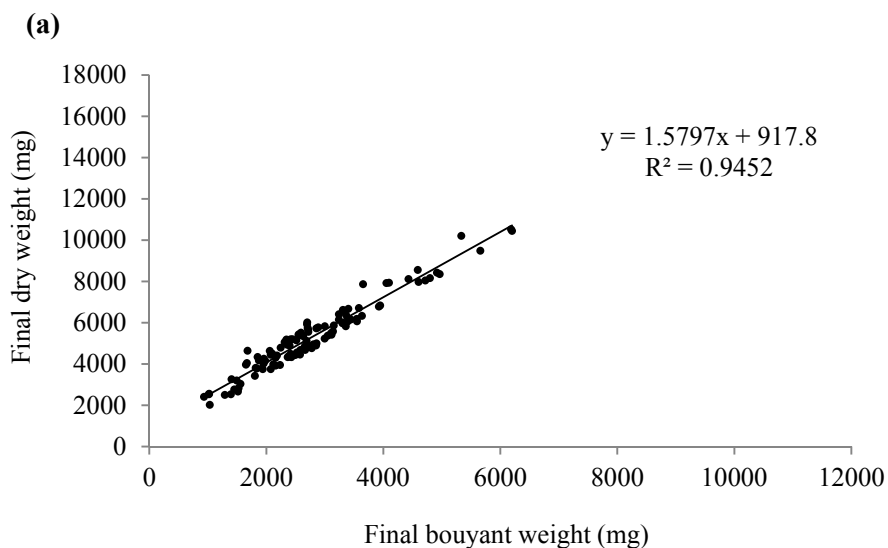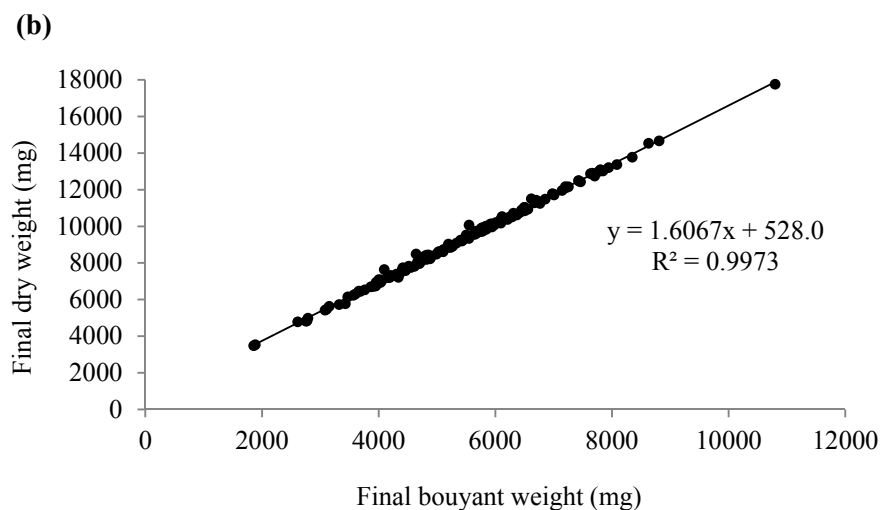

**Figure S6.** Final buoyant weight vs. final dry weight for *S. siderea* corals in low- $p\text{CO}_2$  (a) and high- $p\text{CO}_2$  (b) treatments, including specimens that died before experiment was concluded. The strong linear correlations allow for estimation of dry weights from measured buoyant weights in determination of net calcification rate.



**Table S1.** Dry weight, buoyant weight, and surface area data for the *S. siderea* coral specimens investigated in the experiment. Dry weights were calculated using the empirically derived buoyant weight-dry weight regression equations.

| Treatment               | Replicate | Colony | buoyant weight<br>(mg) |      |       | dry weight<br>(mg) |       |      | Surface<br>area<br>(cm <sup>2</sup> ) | Calc. rate normalized to<br>surface area (mg cm <sup>-2</sup> ) |         |        |
|-------------------------|-----------|--------|------------------------|------|-------|--------------------|-------|------|---------------------------------------|-----------------------------------------------------------------|---------|--------|
|                         |           |        | 0 d                    | 30 d | 60 d  | 0 d                | 30 d  | 60 d |                                       | 0-30 d                                                          | 30-60 d | 0-60 d |
| 31.9 °C at<br>424 ppm-v | 1         | G      | 2359                   | 2433 | 2493  | 4644               | 4761  | 4855 | 2.88                                  | 40.43                                                           | 32.93   | 73.37  |
|                         |           | G      | 2940                   | 2998 | 3047  | 5562               | 5654  | 5732 | 3.39                                  | 27.20                                                           | 22.85   | 50.05  |
|                         |           | H      | 1637                   | 1669 | 1677  | 3504               | 3554  | 3567 | 1.88                                  | 26.59                                                           | 7.00    | 33.59  |
|                         |           | K      | 993                    | 1012 | 1017  | 2486               | 2516  | 2525 | 1.37                                  | 21.46                                                           | 6.52    | 27.98  |
|                         |           | A      | 2003                   | 2046 | 2100  | 4081               | 4149  | 4236 | 3.42                                  | 19.85                                                           | 25.24   | 45.09  |
|                         |           | A      | 3046                   | 3100 | 3139  | 5729               | 5814  | 5876 | 4.18                                  | 20.41                                                           | 14.74   | 35.15  |
|                         |           | B      | 2316                   | 2375 | 2398  | 4576               | 4670  | 4706 | 3.44                                  | 27.10                                                           | 10.57   | 37.67  |
|                         |           | C      | 1359                   | 1383 | 1393  | 3065               | 3102  | 3119 | 2.64                                  | 14.17                                                           | 6.39    | 20.56  |
|                         |           | Q      | 2617                   | 2651 | 2663  | 5052               | 5106  | 5124 | 2.99                                  | 18.12                                                           | 5.98    | 24.10  |
|                         |           | N      | 1570                   | 1625 | 1651  | 3397               | 3484  | 3526 | 2.04                                  | 42.57                                                           | 20.64   | 63.21  |
|                         | O         | 3227   | 3292                   | 3357 | 6016  | 6119               | 6221  | 3.77 | 27.26                                 | 27.12                                                           | 54.38   |        |
|                         | P         | 6088   | 6141                   | 6184 | 10535 | 10619              | 10687 | 6.25 | 13.39                                 | 10.86                                                           | 24.26   |        |
|                         | 2         | G      | 2122                   | 2194 | 2311  | 4269               | 4384  | 4569 | 3.14                                  | 36.45                                                           | 59.12   | 95.57  |
|                         |           | G      | 2853                   | 2914 | 2997  | 5425               | 5522  | 5652 | 4.38                                  | 22.13                                                           | 29.83   | 51.96  |
|                         |           | H      | 1819                   | 1821 | 1835  | 3791               | 3794  | 3817 | 2.01                                  | 1.57                                                            | 11.26   | 12.83  |
|                         |           | K      | 1819                   | 1863 | 1953  | 3791               | 3861  | 4002 | 3.13                                  | 22.35                                                           | 45.21   | 67.56  |
|                         |           | A      | 3529                   | 3578 | 3652  | 6493               | 6569  | 6687 | 3.60                                  | 21.23                                                           | 32.80   | 54.03  |
|                         |           | A      | 1577                   | 1648 | 1668  | 3409               | 3521  | 3552 | 1.76                                  | 63.76                                                           | 17.66   | 81.42  |
|                         |           | B      | 2425                   | 2544 | 2553  | 4748               | 4936  | 4951 | 3.01                                  | 62.52                                                           | 5.08    | 67.59  |
|                         |           | C      | 1749                   | 1801 | 1818  | 3681               | 3763  | 3790 | 2.44                                  | 33.48                                                           | 11.02   | 44.49  |
| P                       |           | 4721   | 4745                   | 4796 | 8376  | 8414               | 8494  | 4.90 | 7.74                                  | 16.23                                                           | 23.97   |        |
| N                       |           | 2458   | 2524                   | 2592 | 4801  | 4905               | 5012  | 3.01 | 34.51                                 | 35.74                                                           | 70.24   |        |
| 3                       | O         | 2488   | 2636                   | 2716 | 4848  | 5082               | 5208  | 2.99 | 78.39                                 | 42.28                                                           | 120.68  |        |
|                         | P         | 2808   | 2838                   | 2856 | 5353  | 5401               | 5429  | 3.63 | 13.21                                 | 7.84                                                            | 21.05   |        |
|                         | G         | 2368   | 2397                   | 2413 | 4658  | 4705               | 4730  | 2.38 | 19.69                                 | 10.62                                                           | 30.31   |        |
|                         |           | G      | 2021                   | 2054 | 2074  | 4110               | 4163  | 4194 | 2.55                                  | 20.89                                                           | 12.00   | 32.88  |

|                         |   |      |      |      |      |      |      |      |      |        |        |        |        |        |
|-------------------------|---|------|------|------|------|------|------|------|------|--------|--------|--------|--------|--------|
|                         |   | H    | 3121 | 3132 | 3152 | 5848 | 5865 | 5898 | 3.20 | 5.43   | 10.21  | 15.64  |        |        |
|                         |   | K    | 2129 | 2163 | 2181 | 4280 | 4335 | 4363 | 3.49 | 15.56  | 8.16   | 23.72  |        |        |
|                         |   | A    | 4516 | 4555 | 4588 | 8052 | 8114 | 8166 | 5.30 | 11.71  | 9.83   | 21.54  |        |        |
|                         |   | A    | 1780 | 1832 | 1849 | 3730 | 3812 | 3839 | 2.40 | 34.26  | 11.20  | 45.45  |        |        |
|                         |   | A    | 2607 | 2667 | 2687 | 5036 | 5131 | 5162 | 5.61 | 17.07  | 5.53   | 22.60  |        |        |
|                         |   | C    | 2509 | 2561 | 2575 | 4881 | 4964 | 4986 | 3.20 | 25.85  | 6.75   | 32.60  |        |        |
|                         |   | M    | 3299 | 3393 | 3402 | 6129 | 6278 | 6292 | 2.69 | 55.48  | 5.29   | 60.77  |        |        |
|                         |   | N    | 2204 | 2304 | 2342 | 4399 | 4557 | 4617 | 2.50 | 63.50  | 24.05  | 87.55  |        |        |
|                         |   | O    | 3013 | 3055 | 3105 | 5677 | 5743 | 5823 | 4.51 | 14.70  | 17.62  | 32.33  |        |        |
|                         |   | P    | 3970 | 4088 | 4095 | 7189 | 7376 | 7387 | 4.15 | 45.09  | 2.67   | 47.75  |        |        |
| 28.1 °C at<br>426 ppm-v | 1 | G    | 1349 | 1430 | 1557 | 3049 | 3176 | 3377 | 2.29 | 55.37  | 87.76  | 143.13 |        |        |
|                         |   | G    | 2095 | 2180 | 2364 | 4227 | 4361 | 4653 | 3.79 | 35.31  | 77.01  | 112.32 |        |        |
|                         |   | H    | 2548 | 2612 | 2696 | 4943 | 5045 | 5176 | 2.37 | 42.88  | 55.55  | 98.43  |        |        |
|                         |   | K    | 917  | 929  | 934  | 2366 | 2385 | 2393 | 1.50 | 12.67  | 4.93   | 17.60  |        |        |
|                         |   | A    | 2870 | 3025 | 3240 | 5451 | 5696 | 6037 | 5.18 | 47.30  | 65.81  | 113.10 |        |        |
|                         |   | A    | 2389 | 2442 | 2445 | 4692 | 4775 | 4780 | 2.17 | 38.38  | 2.43   | 40.80  |        |        |
|                         |   | B    | 1754 | 1837 | 1954 | 3688 | 3819 | 4004 | 2.05 | 63.83  | 89.98  | 153.82 |        |        |
|                         |   | C    | 2438 | 2571 | 2699 | 4769 | 4979 | 5181 | 2.48 | 84.72  | 81.32  | 166.04 |        |        |
|                         |   | M    | 3353 | 3421 | 3549 | 6215 | 6322 | 6525 | 2.21 | 48.80  | 91.41  | 140.21 |        |        |
|                         |   | N    | 2279 | 2503 | 2707 | 4517 | 4872 | 5195 | 3.03 | 117.17 | 106.39 | 223.56 |        |        |
|                         |   | O    | 2554 | 2555 | 2580 | 4952 | 4954 | 4993 | 3.22 | 0.65   | 12.09  | 12.74  |        |        |
|                         |   | P    | 4622 | 4628 | 4716 | 8220 | 8229 | 8368 | 4.25 | 2.10   | 32.68  | 34.78  |        |        |
|                         |   |      | 2    | G    | 4216 | 4352 | 4602 | 7578 | 7792 | 8188   | 5.30   | 40.31  | 74.66  | 114.96 |
|                         |   |      |      | G    | 1935 | 2044 | 2234 | 3975 | 4147 | 4446   | 2.70   | 63.60  | 111.01 | 174.61 |
|                         |   |      |      | H    | 1837 | 1872 | 2157 | 3820 | 3876 | 4325   | 2.75   | 20.12  | 163.64 | 183.76 |
|                         |   |      |      | K    | 1723 | 1872 | 2157 | 3639 | 3876 | 4325   | 2.80   | 84.50  | 160.72 | 245.22 |
|                         | A | 3275 |      | 3399 | 3544 | 6091 | 6287 | 6516 | 2.65 | 73.61  | 86.50  | 160.11 |        |        |
|                         | A | 1829 |      | 1939 | 2059 | 3807 | 3981 | 4170 | 2.73 | 63.75  | 69.34  | 133.09 |        |        |
|                         |   | B    | 2150 | 2267 | 2415 | 4314 | 4500 | 4733 | 3.05 | 60.73  | 76.60  | 137.34 |        |        |
|                         |   | C    | 1787 | 1921 | 2074 | 3741 | 3952 | 4194 | 2.40 | 88.13  | 100.40 | 188.53 |        |        |

|                         |          |   |      |      |      |       |       |       |      |       |        |        |
|-------------------------|----------|---|------|------|------|-------|-------|-------|------|-------|--------|--------|
|                         |          | Q | 870  | 948  | 1034 | 2292  | 2416  | 2551  | 1.24 | 99.71 | 108.62 | 208.34 |
|                         |          | N | 2146 | 2294 | 2551 | 4308  | 4541  | 4948  | 3.03 | 76.94 | 134.25 | 211.18 |
|                         |          | O | 3128 | 3233 | 3442 | 5859  | 6024  | 6355  | 3.84 | 43.07 | 86.00  | 129.07 |
|                         |          | P | 5449 | 5477 | 5659 | 9525  | 9570  | 9857  | 4.90 | 9.14  | 58.71  | 67.85  |
|                         | <b>3</b> | G | 2267 | 2321 | 2426 | 4499  | 4585  | 4751  | 2.90 | 29.59 | 57.18  | 86.76  |
|                         |          | G | 3853 | 3902 | 4052 | 7004  | 7082  | 7318  | 5.42 | 14.39 | 43.56  | 57.95  |
|                         |          | H | 2226 | 2278 | 2352 | 4434  | 4516  | 4633  | 2.80 | 29.51 | 41.55  | 71.06  |
|                         |          | K | 1243 | 1340 | 1492 | 2881  | 3034  | 3275  | 2.38 | 64.36 | 101.29 | 165.64 |
|                         |          | A | 1220 | 1237 | 1289 | 2845  | 2871  | 2954  | 1.83 | 14.39 | 45.18  | 59.56  |
|                         |          | A | 1728 | 1800 | 1872 | 3647  | 3761  | 3875  | 2.39 | 47.53 | 47.75  | 95.28  |
|                         |          | F | 2397 | 2444 | 2519 | 4704  | 4779  | 4898  | 3.74 | 20.01 | 31.85  | 51.87  |
|                         |          | C | 1414 | 1437 | 1450 | 3151  | 3188  | 3208  | 2.01 | 18.34 | 10.22  | 28.56  |
|                         |          | M | 2686 | 2732 | 2848 | 5161  | 5234  | 5417  | 3.48 | 20.87 | 52.63  | 73.50  |
|                         |          | N | 2351 | 2452 | 2586 | 4631  | 4791  | 5002  | 3.08 | 51.97 | 68.56  | 120.53 |
|                         |          | O | 2383 | 2513 | 2630 | 4682  | 4887  | 5072  | 3.02 | 68.05 | 61.24  | 129.29 |
|                         |          | P | 3866 | 3871 | 3945 | 7025  | 7033  | 7150  | 3.62 | 2.04  | 32.33  | 34.37  |
|                         |          |   |      |      |      |       |       |       |      |       |        |        |
| 31.8 °C at<br>940 ppm-v | <b>1</b> | A | 5469 | 5518 | 5546 | 9315  | 9394  | 9439  | 5.30 | 14.86 | 8.49   | 23.35  |
|                         |          | E | 5058 | 5087 | 5104 | 8655  | 8702  | 8729  | 6.00 | 7.77  | 4.55   | 12.32  |
|                         |          | D | 2752 | 2769 | 2769 | 4950  | 4977  | 4976  | 4.55 | 6.00  | -0.12  | 5.89   |
|                         |          | E | 3741 | 3770 | 3759 | 6538  | 6585  | 6568  | 5.10 | 9.23  | -3.46  | 5.77   |
|                         |          | G | 6309 | 6354 | 6367 | 10664 | 10737 | 10758 | 7.09 | 10.28 | 2.95   | 13.22  |
|                         |          | H | 4782 | 4800 | 4814 | 8211  | 8240  | 8263  | 6.34 | 4.56  | 3.72   | 8.28   |
|                         |          | K | 4881 | 4886 | 4878 | 8370  | 8378  | 8365  | 4.70 | 1.71  | -2.85  | -1.14  |
|                         |          | M | 4383 | 4392 | 4396 | 7570  | 7585  | 7591  | 5.03 | 2.87  | 1.17   | 4.04   |
|                         |          | P | 5188 | 5216 | 5232 | 8864  | 8909  | 8934  | 6.44 | 6.98  | 3.91   | 10.89  |
|                         |          | N | 5161 | 5184 | 5194 | 8820  | 8857  | 8874  | 6.01 | 6.24  | 2.76   | 9.00   |
|                         |          | P | 6969 | 7008 | 7004 | 11726 | 11788 | 11781 | 6.37 | 9.75  | -1.09  | 8.66   |
|                         |          | R | 5785 | 5824 | 5836 | 9823  | 9885  | 9905  | 7.02 | 8.78  | 2.90   | 11.68  |
|                         | <b>2</b> | C | 5051 | 5098 | 5093 | 8643  | 8719  | 8710  | 7.48 | 10.17 | -1.22  | 8.95   |
|                         |          | A | 3257 | 3299 | 3321 | 5761  | 5829  | 5864  | 4.46 | 15.14 | 7.93   | 23.07  |

|                         |          |      |      |      |       |       |       |       |       |       |       |        |
|-------------------------|----------|------|------|------|-------|-------|-------|-------|-------|-------|-------|--------|
|                         | E        | 5202 | 5264 | 5266 | 8887  | 8986  | 8989  | 5.67  | 17.58 | 0.57  | 18.15 |        |
|                         | F        | 4311 | 4323 | 4319 | 7454  | 7473  | 7468  | 5.02  | 3.84  | -1.07 | 2.78  |        |
|                         | G        | 8632 | 8767 | 8805 | 14397 | 14613 | 14676 | 7.89  | 27.42 | 7.87  | 35.30 |        |
|                         | I        | 3060 | 3100 | 3107 | 5445  | 5509  | 5519  | 4.33  | 14.85 | 2.48  | 17.33 |        |
|                         | L        | 3879 | 3917 | 3948 | 6761  | 6821  | 6871  | 5.64  | 10.64 | 8.83  | 19.47 |        |
|                         | M        | 6681 | 6761 | 6762 | 11263 | 11391 | 11393 | 5.47  | 23.48 | 0.20  | 23.68 |        |
|                         | N        | 4803 | 4864 | 4874 | 8246  | 8344  | 8359  | 6.50  | 15.08 | 2.31  | 17.39 |        |
|                         | O        | 4568 | 4632 | 4664 | 7867  | 7970  | 8022  | 5.01  | 20.44 | 10.38 | 30.82 |        |
|                         | P        | 5764 | 5841 | 5859 | 9788  | 9913  | 9941  | 6.13  | 20.26 | 4.63  | 24.88 |        |
|                         | P        | 6926 | 6999 | 7004 | 11656 | 11773 | 11781 | 6.42  | 18.18 | 1.25  | 19.43 |        |
| <b>3</b>                | A        | 4079 | 4129 | 4159 | 7082  | 7162  | 7210  | 4.49  | 17.66 | 10.74 | 28.40 |        |
|                         | D        | 5984 | 6047 | 6049 | 10142 | 10244 | 10247 | 6.88  | 14.79 | 0.47  | 15.26 |        |
|                         | A        | 6515 | 6570 | 6613 | 10995 | 11083 | 11154 | 7.84  | 11.28 | 8.95  | 20.23 |        |
|                         | F        | 4052 | 4092 | 4093 | 7038  | 7103  | 7105  | 4.56  | 14.21 | 0.47  | 14.67 |        |
|                         | H        | 6042 | 6068 | 6093 | 10236 | 10277 | 10318 | 5.69  | 7.16  | 7.25  | 14.41 |        |
|                         | I        | 6150 | 6202 | 6208 | 10409 | 10492 | 10503 | 6.48  | 12.82 | 1.65  | 14.47 |        |
|                         | K        | 2689 | 2739 | 2752 | 4848  | 4929  | 4949  | 4.80  | 16.97 | 4.13  | 21.11 |        |
|                         | L        | 4562 | 4591 | 4612 | 7858  | 7905  | 7938  | 5.20  | 8.96  | 6.38  | 15.34 |        |
|                         | J        | 4633 | 4656 | 4697 | 7971  | 8008  | 8075  | 5.57  | 6.64  | 12.03 | 18.66 |        |
|                         | O        | 5199 | 5299 | 5331 | 8881  | 9042  | 9093  | 6.25  | 25.79 | 8.22  | 34.01 |        |
|                         | Q        | 7400 | 7440 | 7458 | 12417 | 12481 | 12511 | 8.06  | 7.97  | 3.72  | 11.69 |        |
|                         | R        | 3575 | 3662 | 3681 | 6271  | 6412  | 6443  | 5.40  | 26.01 | 5.76  | 31.77 |        |
|                         |          |      |      |      |       |       |       |       |       |       |       |        |
| 28.0 °C at<br>888 ppm-v | <b>1</b> | A    | 4959 | 5066 | 5199  | 8496  | 8668  | 8881  | 5.57  | 30.86 | 38.36 | 69.23  |
|                         |          | C    | 3440 | 3523 | 3601  | 6055  | 6188  | 6314  | 5.09  | 26.10 | 24.84 | 50.94  |
|                         |          | D    | 3390 | 3449 | 3470  | 5975  | 6069  | 6103  | 5.29  | 17.72 | 6.38  | 24.10  |
|                         |          | E    | 5333 | 5589 | 5803  | 9096  | 9508  | 9852  | 6.37  | 64.74 | 53.89 | 118.63 |
|                         |          | G    | 6884 | 7180 | 7424  | 11589 | 12065 | 12457 | 7.58  | 62.84 | 51.74 | 114.58 |
|                         |          | H    | 5586 | 5652 | 5731  | 9502  | 9609  | 9737  | 5.80  | 18.38 | 21.98 | 40.37  |
|                         |          | K    | 3668 | 3820 | 3928  | 6421  | 6666  | 6840  | 5.44  | 44.96 | 31.87 | 76.83  |
|                         |          | L    | 5456 | 5649 | 5842  | 9294  | 9605  | 9914  | 5.78  | 53.73 | 53.55 | 107.28 |

|   |   |      |      |      |       |       |       |      |       |       |        |
|---|---|------|------|------|-------|-------|-------|------|-------|-------|--------|
|   | N | 3080 | 3249 | 3426 | 5477  | 5749  | 6033  | 4.33 | 62.86 | 65.71 | 128.57 |
|   | O | 4817 | 4974 | 5108 | 8267  | 8520  | 8736  | 4.90 | 51.68 | 43.92 | 95.60  |
|   | P | 6087 | 6319 | 6557 | 10307 | 10681 | 11063 | 5.47 | 68.34 | 69.81 | 138.15 |
|   | Q | 5304 | 5494 | 5672 | 9049  | 9355  | 9641  | 6.17 | 49.58 | 46.37 | 95.95  |
| 2 | A | 4457 | 4595 | 4729 | 7690  | 7911  | 8126  | 5.15 | 43.06 | 41.61 | 84.67  |
|   | B | 4032 | 4173 | 4336 | 7006  | 7233  | 7494  | 3.82 | 59.54 | 68.22 | 127.76 |
|   | C | 2962 | 3075 | 3150 | 5287  | 5469  | 5589  | 4.31 | 42.09 | 27.93 | 70.02  |
|   | F | 4581 | 4693 | 4774 | 7888  | 8068  | 8198  | 5.76 | 31.25 | 22.51 | 53.75  |
|   | H | 5886 | 5994 | 6100 | 9986  | 10159 | 10329 | 7.02 | 24.71 | 24.17 | 48.88  |
|   | I | 6276 | 6389 | 6422 | 10612 | 10793 | 10846 | 7.01 | 25.82 | 7.49  | 33.31  |
|   | L | 6266 | 6557 | 6853 | 10596 | 11063 | 11539 | 7.28 | 64.20 | 65.30 | 129.50 |
|   | M | 3238 | 3457 | 3658 | 5730  | 6082  | 6405  | 5.28 | 66.55 | 61.28 | 127.83 |
|   | O | 6097 | 6239 | 6447 | 10325 | 10553 | 10886 | 6.45 | 35.40 | 51.69 | 87.09  |
|   | N | 6007 | 6390 | 6733 | 10179 | 10795 | 11345 | 7.55 | 81.46 | 72.88 | 154.35 |
|   | P | 6821 | 7072 | 7251 | 11487 | 11890 | 12179 | 6.90 | 58.37 | 41.84 | 100.21 |
|   | R | 4425 | 4626 | 4819 | 7638  | 7960  | 8270  | 7.36 | 43.76 | 42.16 | 85.92  |
| 3 | D | 2994 | 3029 | 3079 | 5339  | 5394  | 5474  | 4.73 | 11.67 | 16.99 | 28.66  |
|   | D | 4140 | 4171 | 4186 | 7180  | 7229  | 7254  | 5.15 | 9.57  | 4.78  | 14.35  |
|   | E | 5997 | 6106 | 6236 | 10163 | 10339 | 10547 | 5.87 | 29.92 | 35.49 | 65.41  |
|   | F | 5764 | 5853 | 5914 | 9788  | 9931  | 10029 | 7.10 | 20.14 | 13.81 | 33.95  |
|   | G | 5910 | 6196 | 6502 | 10023 | 10484 | 10975 | 6.98 | 65.96 | 70.41 | 136.37 |
|   | H | 7825 | 7882 | 7938 | 13101 | 13191 | 13283 | 5.86 | 15.45 | 15.54 | 30.99  |
|   | K | 4635 | 4770 | 4854 | 7976  | 8192  | 8326  | 5.83 | 37.20 | 22.96 | 60.16  |
|   | M | 6338 | 6512 | 6670 | 10711 | 10990 | 11245 | 7.30 | 38.28 | 34.83 | 73.12  |
|   | N | 3617 | 3823 | 4000 | 6339  | 6670  | 6955  | 5.93 | 55.94 | 47.99 | 103.93 |
|   | O | 5501 | 5651 | 5778 | 9366  | 9607  | 9812  | 5.85 | 41.20 | 35.06 | 76.26  |
|   | Q | 7253 | 7469 | 7631 | 12181 | 12528 | 12788 | 8.20 | 42.35 | 31.70 | 74.05  |
|   | R | 4105 | 4162 | 4207 | 7124  | 7215  | 7287  | 5.02 | 18.15 | 14.41 | 32.56  |

---

**Table S2.** Corallite height ( $\mu\text{m}$ ) and percent-infilling ('%-I') data for *S. siderea* specimens (shown by 'ID') after 60 days growth in the experimental treatments. 'Rep' = replicate tank number.

| 28.1 °C/426 ppm-v |     |        |     | 31.9 °C/424 ppm-v |     |        |     | 28.0 °C/888 ppm-v |     |        |     | 31.8 °C/940 ppm-v |     |        |     |
|-------------------|-----|--------|-----|-------------------|-----|--------|-----|-------------------|-----|--------|-----|-------------------|-----|--------|-----|
| ID                | Rep | Height | %-I | ID                | Rep | Height | %-I | ID                | Rep | Height | %-I | ID                | Rep | Height | %-I |
| A104a             | 1   | 1670.3 | 96  | A110a             | 1   | 1790.0 | 87  | H7                | 1   | 1198.5 | 89  | P12               | 1   | 1072.7 |     |
| G4b               |     | 1409.0 |     | A101a             |     | 1053.9 | 89  | A17               |     | 1146.1 | 81  | K5                |     | 1079.9 |     |
| N102              |     | 1154.6 |     | P101a             |     | 1419.6 |     | K18               |     | 974.4  | 83  | M13               |     | 886.1  |     |
| P102a             |     | 970.6  | 92  | O101a             |     | 1179.7 | 89  | Q1                |     | 1778.5 | 81  | A19               |     | 1298.6 | 88  |
| A105a             | 2   | 1298.6 | 89  | G19b              |     | 1209.4 |     | P3                |     | 1315.8 | 97  | P16               |     | 1335.3 | 88  |
| P105a             |     | 1560.5 | 91  | G1a               |     | 1072.5 | 97  | G18               |     | 1203.5 | 89  | G14               |     | 1429.5 | 84  |
| G12a              |     | 1532.9 | 93  | A102a             | 2   | 1068.2 |     | O11               |     | 1169.0 | 81  | H18               |     | 1138.0 | 89  |
| KBb               |     | 1172.6 | 93  | KBa               |     | 1172.4 | 95  | M17               | 2   | 1483.8 |     | N17               |     | 1000.9 |     |
| O105a             |     | 1573.0 | 85  | P105b             |     | 1252.3 |     | F18               |     | 1279.2 |     | P10               | 2   | 1057.3 | 85  |
| P102b             | 3   | 1403.2 | 89  | O104a             |     | 1147.9 | 94  | H12               |     | 791.7  | 86  | M3                |     | 1140.3 |     |
| GS4a              |     | 1542.6 | 85  | G4a               |     | 1317.0 | 90  | A20               |     | 1086.7 | 82  | P8                |     | 990.0  | 82  |
| F16b              |     | 1408.7 |     | HDa               | 3   | 1352.3 | 92  | P17               |     | 1188.9 | 87  | A109b             |     | 1500.6 | 80  |
| N103b             |     | 1269.1 |     | A103a             |     | 1236.3 | 90  | N11               |     | 1034.8 |     | O5                |     | 1183.2 | 86  |
| OS7a              |     | 1547.9 | 97  | P101b             |     | 1766.5 | 93  | O20               |     | 1307.0 | 83  | G15               |     | 1094.5 | 95  |
| M109b             |     | 1262.9 |     | O107a             |     | 1341.6 | 89  | F15               | 3   | 1481.2 |     | F4                |     | 1311.9 |     |
| AS9a              |     | 1410.7 | 94  | KCa               |     | 1509.1 | 94  | M4                |     | 1216.8 |     | A9                | 3   | 1094.1 | 82  |
| HDb               |     | 1312.7 |     |                   |     |        |     | G8                |     | 1248.3 | 87  | O18               |     | 1134.5 | 85  |
| KCb               |     | 1450.8 | 94  |                   |     |        |     | H5                |     | 888.6  | 85  | K13               |     | 1176.2 | 91  |
|                   |     |        |     |                   |     |        |     | K10               |     | 918.0  | 88  | H11               |     | 1073.0 | 83  |
|                   |     |        |     |                   |     |        |     | N20               |     | 932.2  |     | L7                |     | 1202.8 |     |
|                   |     |        |     |                   |     |        |     | Q13               |     | 1537.0 | 83  | FS5               |     | 1223.8 |     |
|                   |     |        |     |                   |     |        |     |                   |     |        |     | A15               |     | 1057.4 |     |

**Table S3.** Summary of the hierarchical linear mixed effects models evaluated in this study (\* = interactive effect; + = additive effect).

| <b>Model</b> | <b>Fixed Effects</b>                             | <b>Random Effects</b>                                            |
|--------------|--------------------------------------------------|------------------------------------------------------------------|
| 1            | Temperature* <i>p</i> CO <sub>2</sub> *Reef Zone | Random Slopes and Intercepts for Tank and Colony                 |
| 2            | Temperature* <i>p</i> CO <sub>2</sub> *Reef Zone | Random Slopes of Tank and Colony and Random Intercept for Colony |
| 3            | Temperature* <i>p</i> CO <sub>2</sub> *Reef Zone | Random Slopes of Tank and Colony and Random Intercept for Tank   |
| 4            | Temperature* <i>p</i> CO <sub>2</sub> *Reef Zone | Random Slopes for Tank and Colony                                |
| 5            | Temperature* <i>p</i> CO <sub>2</sub>            | Random Slopes and Intercepts for Tank and Colony                 |
| 6            | Temperature* <i>p</i> CO <sub>2</sub>            | Random Slopes of Tank and Colony and Random Intercept for Colony |
| 7            | Temperature* <i>p</i> CO <sub>2</sub>            | Random Slopes of Tank and Colony and Random Intercept for Tank   |
| 8            | Temperature* <i>p</i> CO <sub>2</sub>            | Random Slopes for Tank and Colony                                |
| 9            | Temperature                                      | Random Slopes and Intercepts for Tank and Colony                 |
| 10           | Temperature                                      | Random Slopes of Tank and Colony and Random Intercept for Colony |
| 11           | Temperature                                      | Random Slopes of Tank and Colony and Random Intercept for Tank   |
| 12           | Temperature                                      | Random Slopes for Tank and Colony                                |
| 13           | Temperature+ <i>p</i> CO <sub>2</sub>            | Random Slopes and Intercepts for Tank and Colony                 |
| 14           | Temperature+ <i>p</i> CO <sub>2</sub>            | Random Slopes of Tank and Colony and Random Intercept for Colony |
| 15           | Temperature+ <i>p</i> CO <sub>2</sub>            | Random Slopes of Tank and Colony and Random Intercept for Tank   |

---

|    |                              |                                                                  |
|----|------------------------------|------------------------------------------------------------------|
| 16 | Temperature+pCO <sub>2</sub> | Random Slopes for Tank and Colony                                |
| 17 | pCO <sub>2</sub>             | Random Slopes and Intercepts for Tank and Colony                 |
| 18 | pCO <sub>2</sub>             | Random Slopes of Tank and Colony and Random Intercept for Colony |
| 19 | pCO <sub>2</sub>             | Random Slopes of Tank and Colony and Random Intercept for Tank   |
| 20 | pCO <sub>2</sub>             | Random Slopes for Tank and Colony                                |

---



**Table S4.** Summary of p-values and AIC output for each of the 20 hierarchical linear mixed effects models evaluated for 0-60 day calcification rate, 0-30 day calcification rate, 30-60 day calcification rate, corallite height, and corallite infilling. Model in bold contains the greatest number of significant ( $p < 0.05$ ) fixed effects, with random effects assigned by AIC. ‘\*’ = interactive effect

| Calcification<br>(0-60 day) | Model     | Temperature   | $p\text{CO}_2$ | Temp* $p\text{CO}_2$ | Reef<br>Zone | Temp*<br>Reef<br>Zone | $p\text{CO}_2^*$<br>Reef<br>Zone | Temp* $p\text{CO}_2^*$<br>Reef Zone | AIC           |
|-----------------------------|-----------|---------------|----------------|----------------------|--------------|-----------------------|----------------------------------|-------------------------------------|---------------|
|                             | 1         | 0.09          | 0.65           | 0.75                 | 0.51         | 0.52                  | 0.35                             | 0.38                                | 378.46        |
|                             | 2         | 0.1           | 0.67           | 0.76                 | 0.51         | 0.53                  | 0.35                             | 0.38                                | 377.20        |
|                             | 3         | 0.08          | 0.65           | 0.75                 | 0.50         | 0.52                  | 0.34                             | 0.37                                | 377.90        |
|                             | 4         | 0.09          | 0.66           | 0.76                 | 0.5          | 0.52                  | 0.34                             | 0.37                                | 376.63        |
|                             | 5         | 0.08          | 0.63           | 0.72                 |              |                       |                                  |                                     | 289.85        |
|                             | 6         | 0.09          | 0.64           | 0.74                 |              |                       |                                  |                                     | 288.57        |
|                             | 7         | 0.08          | 0.62           | 0.72                 |              |                       |                                  |                                     | 289.62        |
|                             | 8         | 0.09          | 0.63           | 0.73                 |              |                       |                                  |                                     | 288.34        |
|                             | 9         | 0.001         |                |                      |              |                       |                                  |                                     | 261.95        |
|                             | 10        | 0.002         |                |                      |              |                       |                                  |                                     | 260.64        |
|                             | 11        | 0.001         |                |                      |              |                       |                                  |                                     | 261.78        |
|                             | 12        | 0.002         |                |                      |              |                       |                                  |                                     | 260.47        |
|                             | 13        | 0.0006        | 0.08           |                      |              |                       |                                  |                                     | 272.97        |
|                             | 14        | 0.0008        | 0.05           |                      |              |                       |                                  |                                     | 271.74        |
|                             | 15        | 0.006         | 0.08           |                      |              |                       |                                  |                                     | 272.75        |
|                             | <b>16</b> | <b>0.0008</b> | <b>0.04</b>    |                      |              |                       |                                  |                                     | <b>271.52</b> |
|                             | 17        |               | 0.31           |                      |              |                       |                                  |                                     | 280.68        |
|                             | 18        |               | 0.22           |                      |              |                       |                                  |                                     | 278.87        |
|                             | 19        |               | 0.30           |                      |              |                       |                                  |                                     | 280.47        |
|                             | 20        |               | 0.21           |                      |              |                       |                                  |                                     | 278.65        |

| Calcification<br>(0-30 day) | Model | Temperature | $p\text{CO}_2$ | Temp* $p\text{CO}_2$ | Reef<br>Zone | Temp*<br>Reef<br>Zone | $p\text{CO}_2^*$<br>Reef<br>Zone | Temp* $p\text{CO}_2^*$<br>Reef Zone | AIC    |
|-----------------------------|-------|-------------|----------------|----------------------|--------------|-----------------------|----------------------------------|-------------------------------------|--------|
|                             | 1     | 0.69        | 0.3            | 0.26                 | 0.27         | 0.31                  | 0.15                             | 0.18                                | 388.21 |
|                             | 2     | 0.69        | 0.3            | 0.27                 | 0.27         | 0.31                  | 0.15                             | 0.18                                | 386.73 |

|           |              |      |      |      |      |      |      |               |
|-----------|--------------|------|------|------|------|------|------|---------------|
| 3         | 0.68         | 0.3  | 0.27 | 0.26 | 0.29 | 0.14 | 0.17 | 387.61        |
| 4         | 0.69         | 0.3  | 0.27 | 0.26 | 0.3  | 0.14 | 0.17 | 386.13        |
| 5         | 0.67         | 0.29 | 0.25 |      |      |      |      | 302.50        |
| 6         | 0.68         | 0.29 | 0.26 |      |      |      |      | 301.02        |
| 7         | 0.67         | 0.29 | 0.26 |      |      |      |      | 302.62        |
| 8         | 0.67         | 0.29 | 0.26 |      |      |      |      | 300.62        |
| 9         | 0.001        |      |      |      |      |      |      | 271.99        |
| 10        | 0.001        |      |      |      |      |      |      | 270.22        |
| 11        | 0.001        |      |      |      |      |      |      | 271.59        |
| <b>12</b> | <b>0.001</b> |      |      |      |      |      |      | <b>269.83</b> |
| 13        | 0.001        | 0.29 |      |      |      |      |      | 286.42        |
| 14        | 0.002        | 0.25 |      |      |      |      |      | 284.94        |
| 15        | 0.001        | 0.29 |      |      |      |      |      | 285.99        |
| 16        | 0.002        | 0.24 |      |      |      |      |      | 284.51        |
| 17        |              | 0.5  |      |      |      |      |      | 291.77        |
| 18        |              | 0.46 |      |      |      |      |      | 289.98        |
| 19        |              | 0.49 |      |      |      |      |      | 291.32        |
| 20        |              | 0.45 |      |      |      |      |      | 289.53        |

| Calcification<br>(30-60 day) | Model | Temperature | pCO <sub>2</sub> | Temp*pCO <sub>2</sub> | Reef<br>Zone | Temp*<br>Reef<br>Zone | pCO <sub>2</sub> *<br>Reef<br>Zone | Temp*pCO <sub>2</sub> *<br>Reef Zone | AIC    |
|------------------------------|-------|-------------|------------------|-----------------------|--------------|-----------------------|------------------------------------|--------------------------------------|--------|
|                              | 1     | 0.02        | 0.2              | 0.25                  | 0.27         | 0.33                  | 0.34                               | 0.39                                 | 422.63 |
|                              | 2     | 0.03        | 0.22             | 0.27                  | 0.27         | 0.33                  | 0.34                               | 0.4                                  | 421.40 |
|                              | 3     | 0.02        | 0.2              | 0.25                  | 0.26         | 0.32                  | 0.34                               | 0.39                                 | 421.22 |
|                              | 4     | 0.03        | 0.21             | 0.27                  | 0.26         | 0.32                  | 0.34                               | 0.39                                 | 419.99 |
|                              | 5     | 0.02        | 0.18             | 0.23                  |              |                       |                                    |                                      | 342.47 |
|                              | 6     | 0.02        | 0.19             | 0.24                  |              |                       |                                    |                                      | 341.23 |
|                              | 7     | 0.02        | 0.18             | 0.23                  |              |                       |                                    |                                      | 341.60 |
|                              | 8     | 0.02        | 0.19             | 0.24                  |              |                       |                                    |                                      | 340.36 |
|                              | 9     | 0.004       |                  |                       |              |                       |                                    |                                      | 318.18 |
|                              | 10    | 0.005       |                  |                       |              |                       |                                    |                                      | 317.10 |

|           |              |             |  |               |
|-----------|--------------|-------------|--|---------------|
| 11        | 0.003        |             |  | 317.35        |
| 12        | 0.005        |             |  | 316.28        |
| 13        | 0.001        | 0.07        |  | 327.80        |
| 14        | 0.002        | 0.03        |  | 326.50        |
| 15        | 0.001        | 0.07        |  | 326.94        |
| <b>16</b> | <b>0.001</b> | <b>0.03</b> |  | <b>325.64</b> |
| 17        |              | 0.24        |  | 334.79        |
| 18        |              | 0.15        |  | 332.96        |
| 19        |              | 0.24        |  | 333.96        |
| 20        |              | 0.14        |  | 332.12        |

| Corallite height | Model | Temperature | pCO <sub>2</sub> | Temp*pCO <sub>2</sub> | Reef Zone | Temp* Reef Zone | pCO <sub>2</sub> * Reef Zone | Temp*pCO <sub>2</sub> * Reef Zone | AIC     |
|------------------|-------|-------------|------------------|-----------------------|-----------|-----------------|------------------------------|-----------------------------------|---------|
|                  | 1     | 0.32        | 0.38             | 0.49                  | 0.6       | 0.59            | 0.43                         | 0.43                              | 1028.43 |
|                  | 2     | 0.31        | 0.37             | 0.48                  | 0.6       | 0.59            | 0.42                         | 0.42                              | 1026.43 |
|                  | 3     | 0.33        | 0.41             | 0.52                  | 0.54      | 0.54            | 0.38                         | 0.38                              | 1026.92 |
|                  | 4     | 0.32        | 0.39             | 0.51                  | 0.54      | 0.54            | 0.37                         | 0.38                              | 1024.92 |
|                  | 5     | 0.28        | 0.32             | 0.43                  |           |                 |                              |                                   | 1038.25 |
|                  | 6     | 0.27        | 0.31             | 0.42                  |           |                 |                              |                                   | 1036.25 |
|                  | 7     | 0.3         | 0.34             | 0.46                  |           |                 |                              |                                   | 1037.04 |
|                  | 8     | 0.29        | 0.33             | 0.45                  |           |                 |                              |                                   | 1035.04 |
|                  | 9     | 0.4         |                  |                       |           |                 |                              |                                   | 1038.05 |
|                  | 10    | 0.4         |                  |                       |           |                 |                              |                                   | 1036.08 |
|                  | 11    | 0.39        |                  |                       |           |                 |                              |                                   | 1036.75 |
|                  | 12    | 0.39        |                  |                       |           |                 |                              |                                   | 1034.76 |
|                  | 13    | 0.28        | 0.01             |                       |           |                 |                              |                                   | 1032.67 |
|                  | 14    | 0.28        | 0.004            |                       |           |                 |                              |                                   | 1030.67 |
|                  | 15    | 0.28        | 0.01             |                       |           |                 |                              |                                   | 1031.40 |
|                  | 16    | 0.28        | 0.005            |                       |           |                 |                              |                                   | 1029.40 |
|                  | 17    |             | 0.01             |                       |           |                 |                              |                                   | 1038.82 |
|                  | 18    |             | 0.003            |                       |           |                 |                              |                                   | 1036.82 |

|           |              |                |
|-----------|--------------|----------------|
| 19        | 0.01         | 1037.52        |
| <b>20</b> | <b>0.003</b> | <b>1035.52</b> |

| <b>Corallite infilling</b> | <b>Model</b> | <b>Temperature</b> | <b>pCO<sub>2</sub></b> | <b>Temp*pCO<sub>2</sub></b> | <b>Reef Zone</b> | <b>Temp* Reef Zone</b> | <b>pCO<sub>2</sub>* Reef Zone</b> | <b>Temp*pCO<sub>2</sub>* Reef Zone</b> | <b>AIC</b>     |
|----------------------------|--------------|--------------------|------------------------|-----------------------------|------------------|------------------------|-----------------------------------|----------------------------------------|----------------|
|                            | 1            | 0.5                | 0.23                   | 0.35                        | 0.27             | 0.27                   | 0.33                              | 0.36                                   | -2.16          |
|                            | 2            | 0.49               | 0.22                   | 0.34                        | 0.26             | 0.26                   | 0.32                              | 0.35                                   | -4.16          |
|                            | 3            | 0.48               | 0.22                   | 0.34                        | 0.27             | 0.27                   | 0.34                              | 0.36                                   | -4.15          |
|                            | 4            | 0.47               | 0.2                    | 0.33                        | 0.26             | 0.26                   | 0.32                              | 0.35                                   | -6.15          |
|                            | 5            | 0.87               | 0.48                   | 0.69                        |                  |                        |                                   |                                        | -121.89        |
|                            | 6            | 0.86               | 0.47                   | 0.68                        |                  |                        |                                   |                                        | -123.89        |
|                            | 7            | 0.86               | 0.48                   | 0.69                        |                  |                        |                                   |                                        | -123.89        |
|                            | 8            | 0.86               | 0.47                   | 0.68                        |                  |                        |                                   |                                        | -125.89        |
|                            | 9            | 0.8                |                        |                             |                  |                        |                                   |                                        | -147.19        |
|                            | 10           | 0.79               |                        |                             |                  |                        |                                   |                                        | -149.08        |
|                            | 11           | 0.8                |                        |                             |                  |                        |                                   |                                        | -149.19        |
|                            | 12           | 0.79               |                        |                             |                  |                        |                                   |                                        | -151.08        |
|                            | 13           | 0.53               | 0.002                  |                             |                  |                        |                                   |                                        | -144.66        |
|                            | 14           | 0.52               | 0.0006                 |                             |                  |                        |                                   |                                        | -146.66        |
|                            | 15           | 0.52               | 0.002                  |                             |                  |                        |                                   |                                        | -146.66        |
|                            | 16           | 0.51               | 0.0005                 |                             |                  |                        |                                   |                                        | -148.66        |
|                            | 17           |                    | 0.002                  |                             |                  |                        |                                   |                                        | -156.17        |
|                            | 18           |                    | 0.0004                 |                             |                  |                        |                                   |                                        | -158.17        |
|                            | 19           |                    | 0.001                  |                             |                  |                        |                                   |                                        | -158.17        |
|                            | <b>20</b>    |                    | <b>0.0003</b>          |                             |                  |                        |                                   |                                        | <b>-160.17</b> |

**Table S5.** Summary of statistical parameters for hierarchical linear mixed effects models containing the most significant ( $p < 0.05$ ) fixed effects (with random effects assigned by AIC) for 0-60 day calcification rate (temperature and  $p\text{CO}_2$ ), 0-30 day calcification rate (temperature only), 30-60 day calcification rate (temperature and  $p\text{CO}_2$ ), corallite height ( $p\text{CO}_2$  only), and corallite infilling ( $p\text{CO}_2$  only). Relative variance of the random effects (tank, colony) is proportional to the relative magnitude of their impacts on the dependent variable (calcification rate, corallite height, corallite infilling).

| <b>0-60 day calcification</b> | <b>Fixed effects</b>  | <b>Value</b>    | <b>SE</b> | <b><i>t</i>-value</b> | <b><i>p</i>-value</b> |
|-------------------------------|-----------------------|-----------------|-----------|-----------------------|-----------------------|
|                               | Intercept             | 9.73            | 1.63      | 5.99                  |                       |
|                               | Temperature           | -0.270          | 0.06      | -5.00                 | 0.0008                |
|                               | $p\text{CO}_2$        | -0.000977       | 0.000420  | -2.33                 | 0.04                  |
|                               | <b>Random effects</b> | <b>Variance</b> | <b>SD</b> |                       |                       |
|                               | Colony                | 0.0000490       | 0.00700   |                       |                       |
|                               | Tank                  | 0.000116        | 0.0108    |                       |                       |

  

| <b>0-30 day calcification</b> | <b>Fixed effects</b>  | <b>Value</b>    | <b>SE</b> | <b><i>t</i>-value</b> | <b><i>p</i>-value</b> |
|-------------------------------|-----------------------|-----------------|-----------|-----------------------|-----------------------|
|                               | Intercept             | 6.62            | 1.28      | 5.17                  |                       |
|                               | Temperature           | -0.19           | 0.04      | -4.38                 | 0.001                 |
|                               | <b>Random effects</b> | <b>Variance</b> | <b>SD</b> |                       |                       |
|                               | Colony                | 0.0000658       | 0.00811   |                       |                       |
|                               | Tank                  | 0.0000624       | 0.00790   |                       |                       |

  

| <b>30-60 day calcification</b> | <b>Fixed effects</b>  | <b>Value</b>    | <b>SE</b> | <b><i>t</i>-value</b> | <b><i>p</i>-value</b> |
|--------------------------------|-----------------------|-----------------|-----------|-----------------------|-----------------------|
|                                | Intercept             | 12.85           | 2.40      | 5.36                  |                       |
|                                | Temperature           | -0.36           | 0.08      | -4.51                 | 0.001                 |
|                                | $p\text{CO}_2$        | -0.002          | 0.001     | -2.61                 | 0.03                  |
|                                | <b>Random effects</b> | <b>Variance</b> | <b>SD</b> |                       |                       |
|                                | Colony                | 0.0000414       | 0.00643   |                       |                       |
|                                | Tank                  | 0.000269        | 0.0164    |                       |                       |

| <b>Corallite height</b> | <b>Fixed effects</b>     | <b>Value</b>    | <b>SE</b> | <b><i>t</i>-value</b> | <b><i>p</i>-value</b> |
|-------------------------|--------------------------|-----------------|-----------|-----------------------|-----------------------|
|                         | Intercept                | 1511.05         | 72.39     | 20.87                 |                       |
|                         | <i>p</i> CO <sub>2</sub> | -0.36           | 0.09      | -3.97                 | 0.003                 |
|                         | <b>Random effects</b>    | <b>Variance</b> | <b>SD</b> |                       |                       |
|                         | Colony                   | 4.945           | 2.224     |                       |                       |
|                         | Tank                     | 0.000           | 0.000     |                       |                       |

| <b>Corallite infilling</b> | <b>Fixed effects</b>     | <b>Value</b>    | <b>SE</b> | <b><i>t</i>-value</b> | <b><i>p</i>-value</b> |
|----------------------------|--------------------------|-----------------|-----------|-----------------------|-----------------------|
|                            | Intercept                | 0.965           | 0.0161    | 60.06                 |                       |
|                            | <i>p</i> CO <sub>2</sub> | -0.000119       | 0.0000210 | -5.66                 | 0.0003                |
|                            | <b>Random effects</b>    | <b>Variance</b> | <b>SD</b> |                       |                       |
|                            | Colony                   | 0.000000136     | 0.000369  |                       |                       |
|                            | Tank                     | 0.000           | 0.000     |                       |                       |
